# Supplementary material
Source: PubMed Central journal article supplement (PMC7346791)
Supplement: mmc1.pdf [file mmc1.pdf]

**Matter, Volume 3**

**Supplemental Information**

**Quantitative Method for Comparative Assessment  
of Particle Removal Efficiency of Fabric Masks  
as Alternatives to Standard Surgical Masks for PPE**

**Amy V. Mueller, Matthew J. Eden, Jessica M. Oakes, Chiara Bellini, and Loretta A. Fernandez**

**SUPPLEMENTAL INFORMATION**

**Table S11.** Mask details, mean filtration efficiency ( $\bar{x}$ ), standard deviation of mean filtration efficiency between replicates\* ( $s_r$ ), and standard deviation of filtration efficiency over one minute runs ( $s_t$ ).

| Sample | Description                                                                                                                                                                                               | worn as designed |       |       | worn with overlayer |       |       |
|--------|-----------------------------------------------------------------------------------------------------------------------------------------------------------------------------------------------------------|------------------|-------|-------|---------------------|-------|-------|
|        |                                                                                                                                                                                                           | $\bar{x}$        | $s_r$ | $s_t$ | $\bar{x}$           | $s_r$ | $s_t$ |
| N95-1  |                                                                                                                                                                                                           | 99.2%            | 0.4%  | 0.8%  | -                   | -     | -     |
| N95-2  | Makrite model 9500-N95                                                                                                                                                                                    | 90.6%            | 5.9%  | 4.6%  | 95.2%               | 0.9%  | 4.7%  |
| S-1    | 3M surgical mask model 1826                                                                                                                                                                               | 74.6%            | 4.1%  | 9.5%  | 90.3%               | 1.5%  | 3.9%  |
| S-2    | Keystone surgical mask model FM-EL-BLUE                                                                                                                                                                   | 59.3%            | 3.3%  | 13.0% | 86.0%               | 3.2%  | 2.7%  |
| S-3    | Hong Da Wei Cai surgical mask labeled for medical use                                                                                                                                                     | 53.4%            | 4.4%  | 12.6% | 90.0%               | 6.0%  | 5.6%  |
| O-1    | surgical style 4 layer mask with black "charcoal" layer (no brand information available)                                                                                                                  | 73.4%            | 4.1%  | 9.7%  | 86.8%               | 0.4%  | 5.2%  |
| CS-1   | cloth surgical-style mask with earloops and wired nose bridge, layers (3): two cotton quilting fabric and one Pellon interfacing fabric                                                                   | 58.6%            | 5.0%  | 11.6% | 77.5%               | 6.2%  | 0.8%  |
| CS-2   | fabric surgical style mask with earloops, no wire at bridge of nose, layers: two cotton plain weave                                                                                                       | 28.2%            | 5.9%  | 24.3% | 73.2%               | 1.4%  | 1.2%  |
| CS-3   | fabric surgical style mask with ties, wired nose bridge, layers (6): two Smartfab nonwoven fabric, two disposable baby wipe (dry), one massage table non-woven fabric cover, one meltblown filter (BFE85) | 85.0%            | 1.3%  | 5.4%  | 81.3%               | 3.4%  | 7.9%  |
| CS-4   | fabric surgical style mask with ties, wired nose bridge, layers (2): two cotton duck                                                                                                                      | 72.9%            | 8.8%  | 7.1%  | 78.5%               | 12.3% | 6.7%  |
| CS-5   | fabric surgical style mask with ties, no wire at bridge of nose, layers (2): two layers of cotton twill (sold by Reformation clothing company at thereformation.com)                                      | 56.0%            | 3.9%  | 13.1% | 66.9%               | 1.7%  | 10.2% |

**Table S11 (cont.).** Mask details, mean filtration efficiency ( $\bar{x}$ ), standard deviation of mean filtration efficiency between replicates\* ( $s_r$ ), and standard deviation of filtration efficiency over one minute runs ( $s_t$ ).

| Sample | Description                                                                                                                                                                                                        | worn as designed |       |       | worn with overlayer |       |       |
|--------|--------------------------------------------------------------------------------------------------------------------------------------------------------------------------------------------------------------------|------------------|-------|-------|---------------------|-------|-------|
|        |                                                                                                                                                                                                                    | $\bar{x}$        | $s_r$ | $s_t$ | $\bar{x}$           | $s_r$ | $s_t$ |
| CS-6   | fabric surgical style mask with earloops, no wire at bridge of nose, layers (2): woven nylon                                                                                                                       | 47.1%            | 2.3%  | 12.2% | 56.8%               | 5.9%  | 8.7%  |
| CC-1   | commercially produced nuisance dust mask modified with cloth liner, layers (4): two Smartfab nonwoven fabric, one disposable baby wipe (dry), one meltblown filter (BFE84)                                         | 85.9%            | 6.3%  | 4.7%  | 89.3%               | 1.5%  | 3.8%  |
| CC-2   | commercially produced nuisance dust mask                                                                                                                                                                           | 60.3%            | 3.2%  | 10.4% | 61.1%               | 2.8%  | 9.4%  |
| CC-3   | fabric cone-shaped mask with elastic head band and wired nose bridge, layers (6): two cotton muslin fabric, two disposable baby wipe (dry), one massage table cover non-woven fabric, one meltblown filter (BFE85) | 86.2%            | 1.0%  | 5.5%  | 88.5%               | 0.9%  | 3.8%  |
| CC-4   | fabric cone-shaped mask with elastic head band, layers (6): two Smartfab nonwoven fabric, two disposable baby wipe (dry), one massage table non-woven fabric cover, one meltblown filter (BFE85)                   | 89.1%            | 1.7%  | 3.4%  | 91.7%               | 2.8%  | 4.3%  |
| CC-5   | fabric cone-shaped mask with elastic head band, wired nose bridge, PM2.5 filter insert, layers (4, including pocket): three cotton muslin, one massage table non-woven fabric cover                                | 80.2%            | 2.5%  | 7.1%  | 84.3%               | 2.5%  | 5.9%  |

**Table S11 (cont.).** Mask details, mean filtration efficiency ( $\bar{x}$ ), standard deviation of mean filtration efficiency between replicates\* ( $s_r$ ), and standard deviation of filtration efficiency over one minute runs ( $s_t$ ).

| Sample | Description                                                                                                                                                                  | worn as designed |       |       | worn with overlayer |       |       |
|--------|------------------------------------------------------------------------------------------------------------------------------------------------------------------------------|------------------|-------|-------|---------------------|-------|-------|
|        |                                                                                                                                                                              | $\bar{x}$        | $s_r$ | $s_t$ | $\bar{x}$           | $s_r$ | $s_t$ |
| CC-6   | fabric cone-shaped mask with elastic head band, layers (5): two Smartfab nonwoven fabric, one massage table non-woven fabric cover, two meltblown filter (BFE85)             | 90.7%            | 0.8%  | 3.1%  | 91.5%               | 1.1%  | 3.1%  |
| CC-7   | fabric cone-shaped mask with elastic head band, wired nose bridge, layers (4): two Smartfab nonwoven, one massage table non-woven fabric cover, two meltblown filter (BFE85) | 85.3%            | 2.2%  | 4.6%  | 87.2%               | 0.9%  | 4.4%  |
| CC-8   | fabric cone-shaped mask with two sets of ties, wired nose bridge, layers (3): two cotton fabric, one non-woven polypropylene (recycled grocery bag)                          | 82.6%            | 1.2%  | 5.7%  | 81.3%               | 2.4%  | 8.5%  |
| CD-1   | duck-bill shaped mask with elastic head band, wired nose bridge, layers (6): 4 cotton fabric, 2 Pellon interfacing                                                           | 64.2%            | 11.0% | 9.5%  | 80.2%               | 1.8%  | 6.3%  |
| N only | woven nylon stocking                                                                                                                                                         | 7.0%             | 2.5%  | 18.0% | -                   | -     | -     |

\* n=4 replicates for mask CS-1, all other masks n=3 replicates

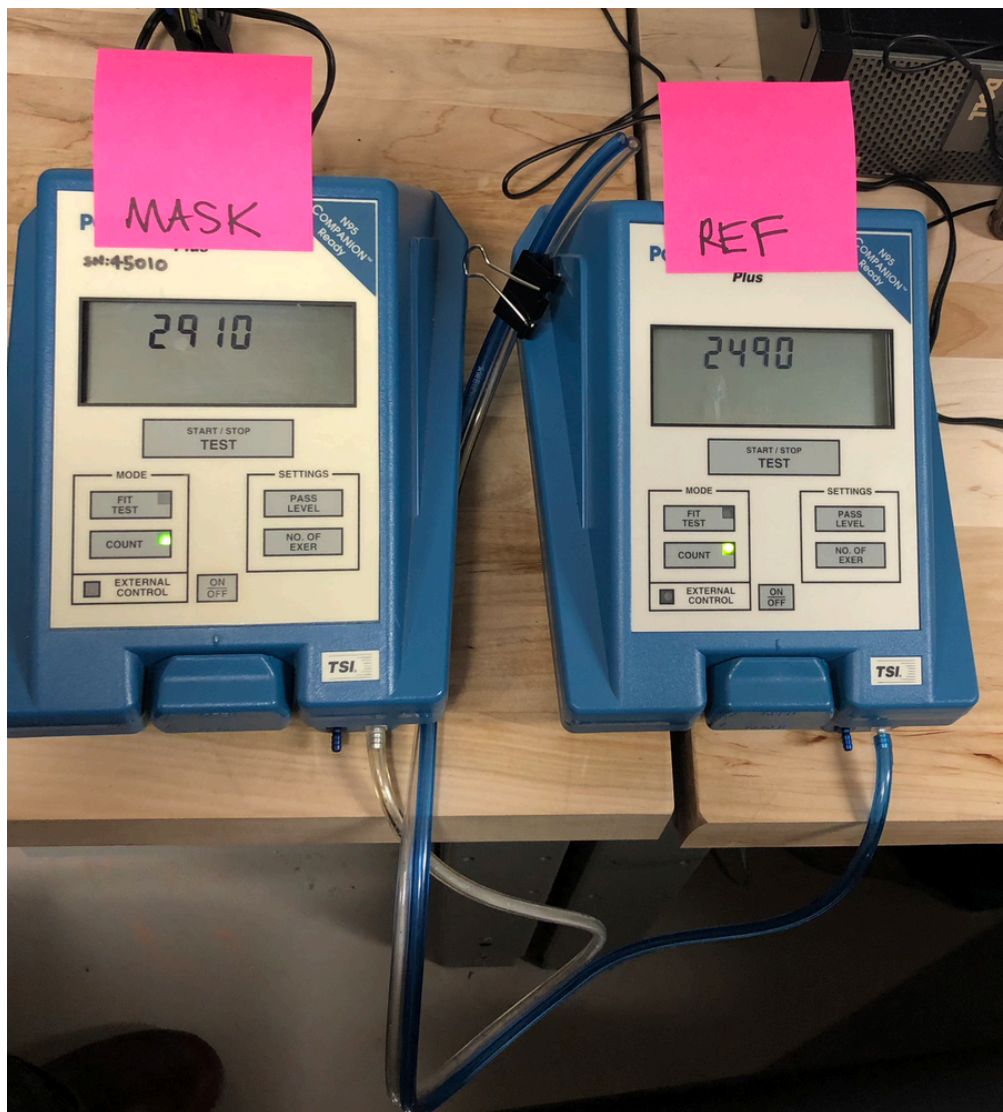

**Figure S1.** Two TSI PortaCount model 8028 used in this work. Sample tubes are of equal length and are connected to right-hand ports labeled “sample”. Instruments were operated in count mode with “Mask”-labeled instrument sampling air from inside the mask and “Ref”-labeled instrument sampling ambient air just outside of the mask.

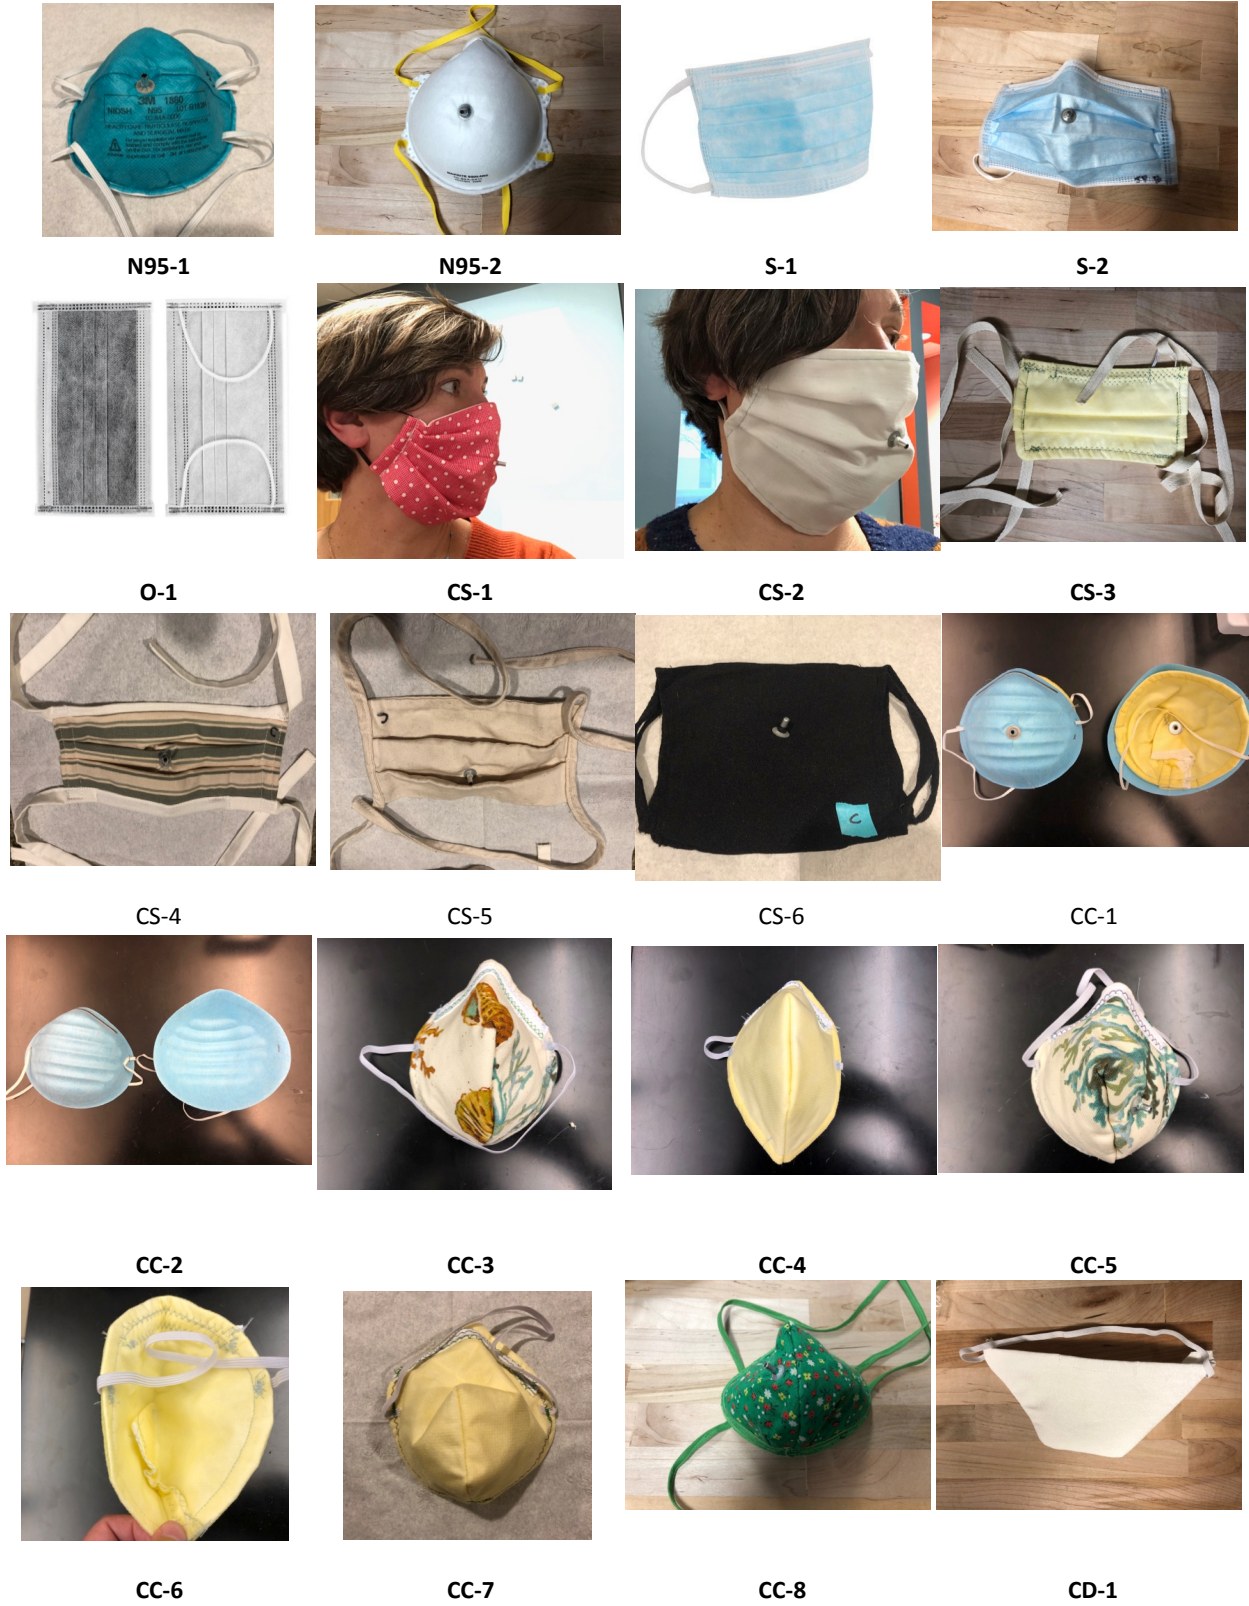

**Figure S2.** Gallery of mask images. Masks ordered by sample ID. Descriptions included in Table S1.

Additional and updated results are available through a web portal at [masktestingatNU.com](http://masktestingatNU.com).
